# Supplementary material for: TbPIF5 Is a Trypanosoma brucei Mitochondrial DNA Helicase Involved in Processing of Minicircle Okazaki Fragments
Source: PubMed Central journal article supplement (PMC2743194; doi:10.1371/journal.ppat.1000589), 2009-09-25

**A**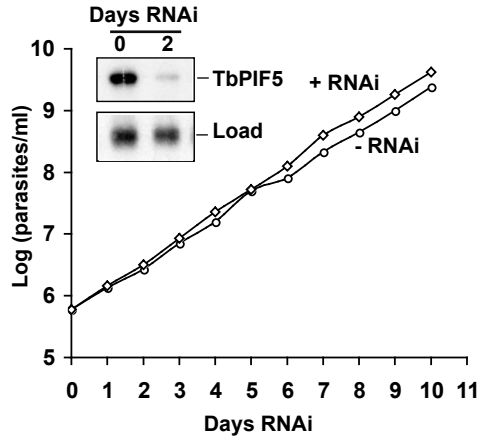**B**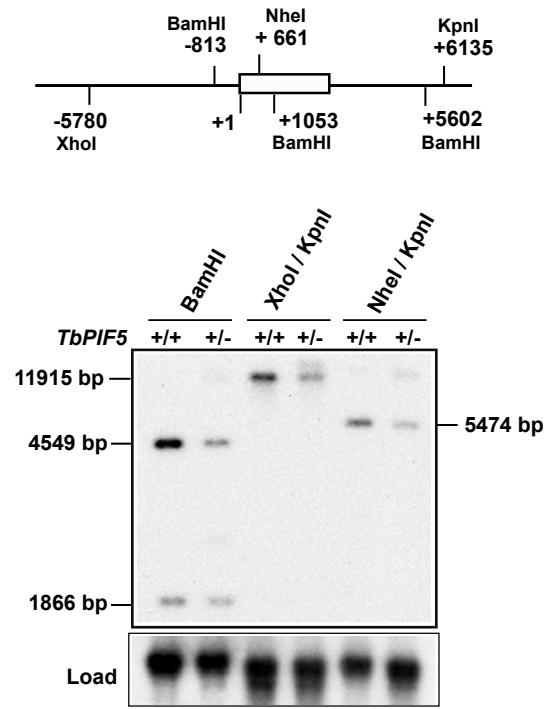

Supplement: ppat.1000589.s001.pdf [file ppat.1000589.s001.pdf]
